# Supplementary material
Source: ML conference proceedings conference paper supplement (https://openreview.net/forum?id=RdJY39KRUCX)
Supplement: supplementary_material [file attachment]

# Supplementary Materials for "Vector Quantized Diffusion Model with CodeUnet for Text-to-Sign Pose Sequences Generation"

Anonymous Author(s)

Affiliation

Address

email

## 1 Structured Prediction Layer for Sign Skeleton

In this part, we illustrate the hierarchy chains of the pose in Fig. 1 and the hand in Fig. 2. The Structured Prediction Layer (SPL) models the structure of the skeleton and hence the spatial dependencies between joints.

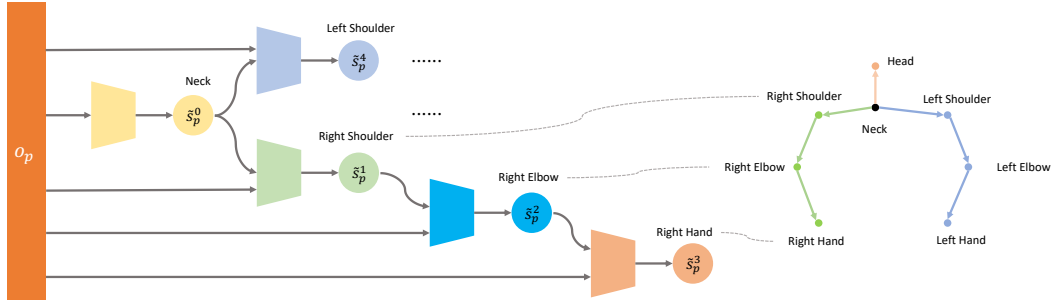

Figure 1: SPL for pose joints. Given the pose feature  $o_p$ , joint prediction  $\hat{s}_p^{(k)}$  are made hierarchically by following the spatial chain defined by the underlying skeleton.

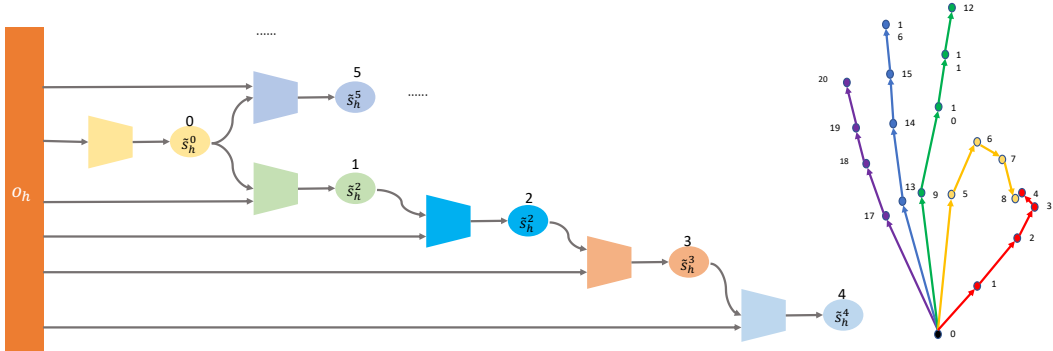

Figure 2: SPL for hand joints. Given the left hand feature or right hand feature  $o_h$ , joint prediction  $\hat{s}_h^{(k)}$  are made hierarchically by following the spatial chain defined by the underlying skeleton.

## 2 Detail of Model architecture

In our experiments for conditional sign pose sequence generation, the input for Pose-VQVAE model is the sign skeleton sequences with 50 joints every frame, where 8 joints for pose, 21 joints for left hand and 21 joints for right hand. Every joint is represented by  $x, y, z$  coordinate values.

### 2.1 Pose-VQVAE

| <i>Encoder and Decoder</i>            |                         |
|---------------------------------------|-------------------------|
| Input size                            | $T \times 50 \times 3$  |
| Units of Linear Layer                 | 256                     |
| Latent size                           | $T \times 3 \times 256$ |
| Spatial Transformer layers            | 3                       |
| Temporal Transformer layers           | 3                       |
| <i>Codebook</i>                       |                         |
| Embedding size                        | 256                     |
| $\beta$ (commitment loss coefficient) | 0.25                    |
| Codebook size                         | 2048                    |
| <i>Others</i>                         |                         |
| Batch size per GPU                    | 6                       |
| Learning rate                         | 3e-4                    |

Table 1: Hyperparameters of Pose-VQVAE.

### 2.2 PoseVQ-Diffusion

| <i>CodeUnet</i>                        |              |
|----------------------------------------|--------------|
| Input size                             | $T \times 3$ |
| Embedding size                         | 512          |
| Transformer encoder layers             | 6            |
| Transformer decoder layers every block | 2            |
| Temporal downsample size               | 4            |
| <i>Others</i>                          |              |
| Batch size per GPU                     | 4            |
| Learning rate                          | 3e-4         |
| $\delta$                               | 0.01         |
| $\lambda$                              | 1.0          |

Table 2: Hyperparameters of Pose-VQVAE.

## 3 Results

In this section, we provide more visualization results. In Fig. 3, we show predicted sign pose sequences that are sampled every 2 frames for a total of 32 frames. Moreover, we provides some videos in additional mp4 files.

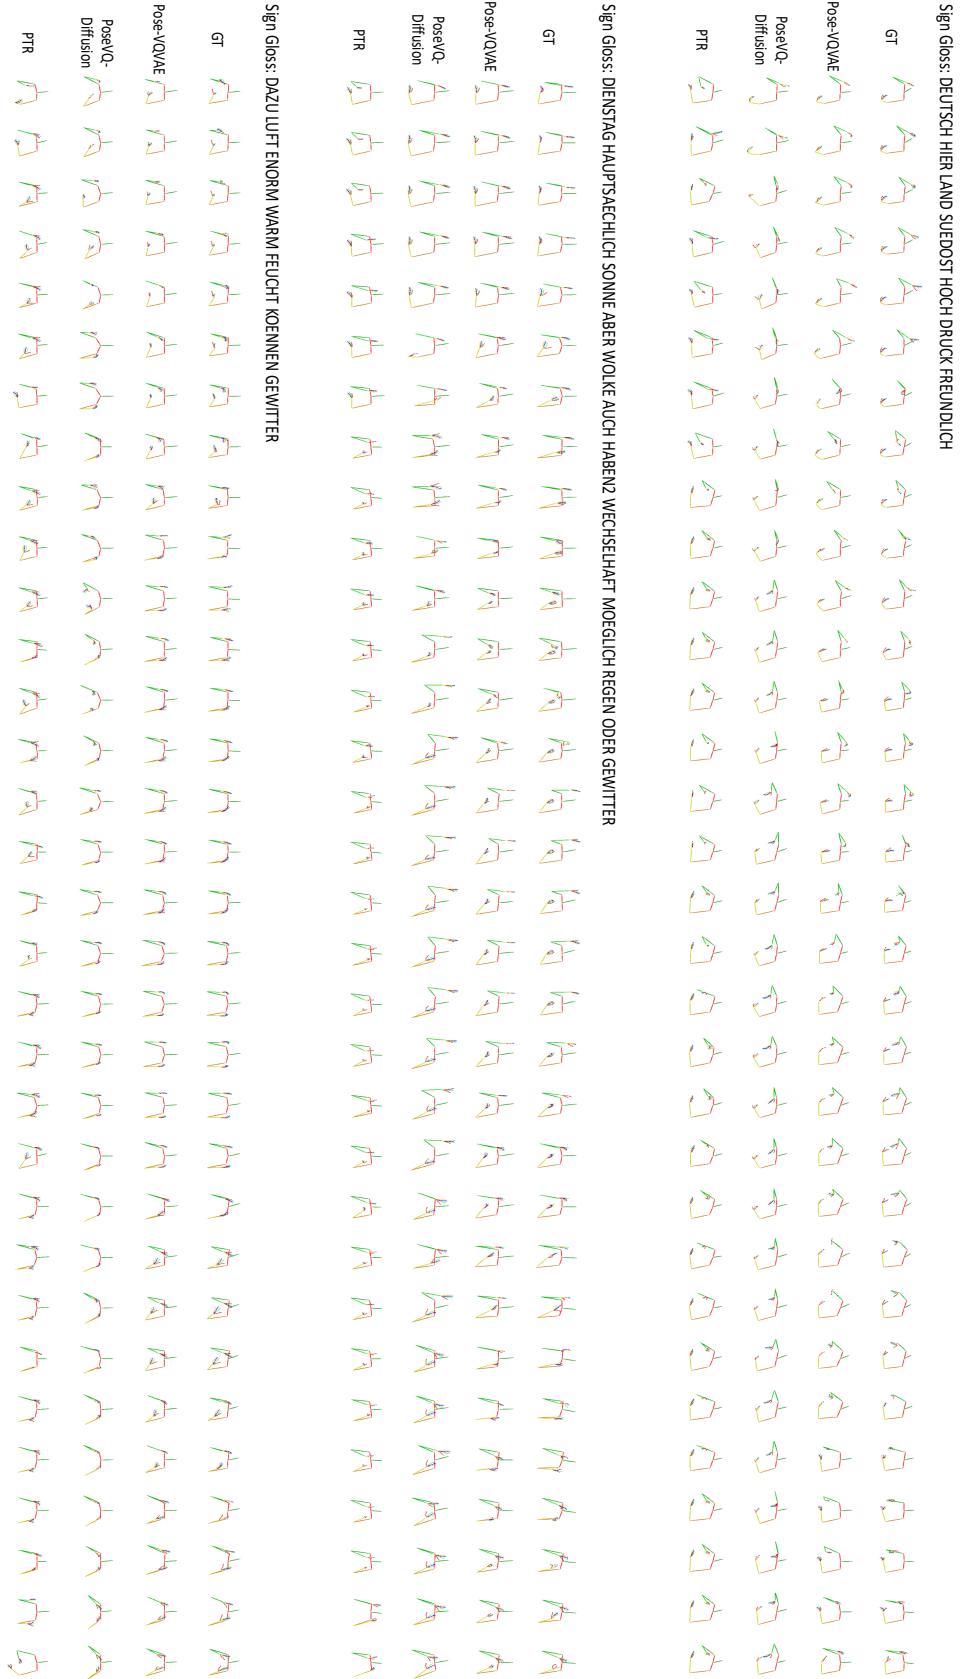

Figure 3: examples of predicted sign pose sequences compared with our reconstruction model and previous G2P model. For readability, we sampled every 2 frames for a total of 32 frames.
